# Supplementary material for: A cabbage leaf like nanostructure of a NiS@ZnS composite on Ni foam with excellent electrochemical performance for supercapacitors
Source: Royal Society of Chemistry journal article supplement (doi:10.1039/c8dt04139c), 2018-11-28
Supplement: c8dt04139c1.pdf [file c8dt04139c1.pdf]

**Supporting Information**

**Cabbage leaves like nanostructure of NiS@ZnS  
composite on Ni foam with excellent electrochemical  
performance for supercapacitors**

**Ikkurthi Kanaka Durga<sup>a</sup>, S. Srinivasa Rao<sup>\*b</sup>, Jin-Woo Ahn<sup>b</sup>, Chozyhidakath**

**Damodharan Sunesh<sup>c</sup>, and Hee-Je Kim<sup>a\*</sup>**

<sup>a</sup> School of Electrical Engineering, Pusan National University, Busandaehak-ro 63beon-gil,  
Geumjeong-gu, Busan, 46241, Rep. of KOREA

<sup>b</sup> School of Mechanical and Mechatronics Engineering, KyungSung University, 309 Suyeong-ro Nam-  
gu Busan, 48434, Rep. of KOREA

<sup>c</sup> St' Albert's College (Autonomous), Ernakulam, 682018, Kerala, India.

<sup>\*</sup>Corresponding Author. Tel: +82 51 510 2364. Fax: +82 51 513 0212. E-mail:

[heeje@pusan.ac.kr](mailto:heeje@pusan.ac.kr) (H.-J. Kim) and [srinu.krs@gmail.com](mailto:srinu.krs@gmail.com) (S.S. Rao).

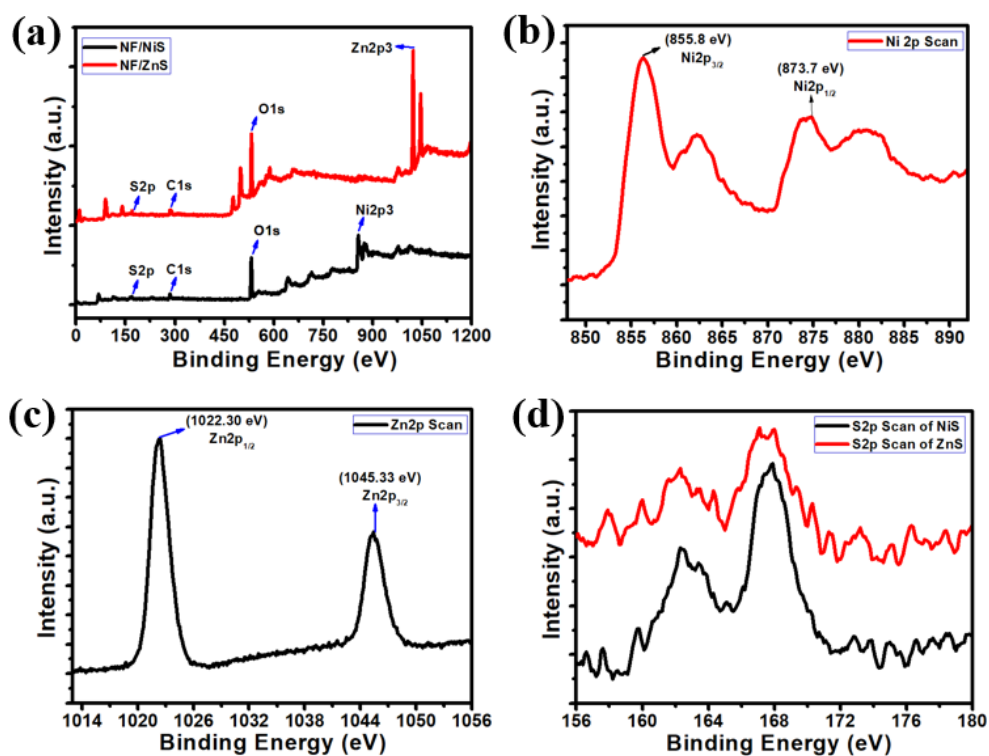

**Fig. S1** (a) XPS survey spectrum of NiS and ZnS electrode material on Ni foam substrate: (b) Ni 2p scan of NiS, (c) Zn2p scan of ZnS and (d) S2p scan of NiS and ZnS.

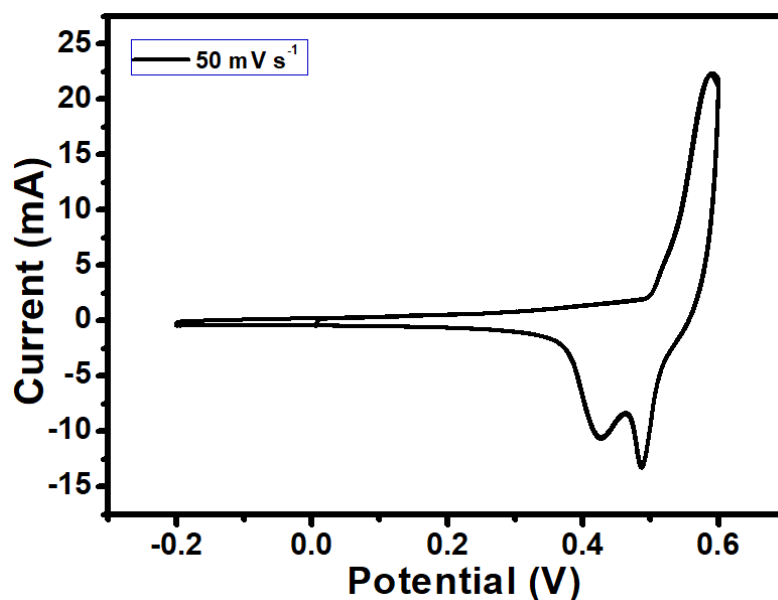

**Fig. S2.** CV curve of bare nickel foam at scan rate of  $50 \text{ mV s}^{-1}$ .

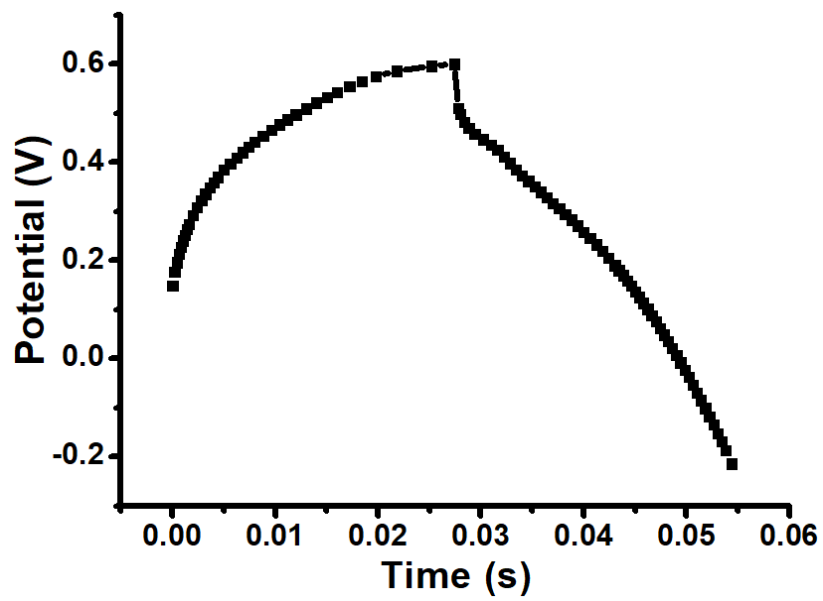

Fig. S3. GCD curve of bare nickel foam.

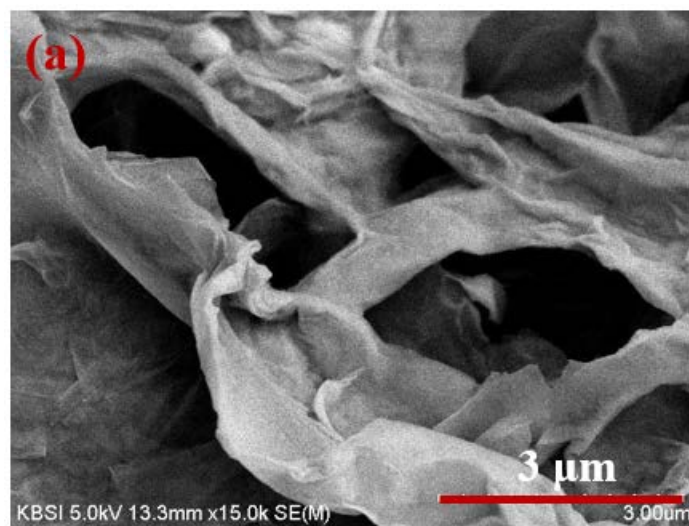

Fig. S4. HR-SEM image of NiS@ZnS composite after 3000 GCD cycles.
